# 1 Thermal hazards for queen honey bees

2 Alison McAfee<sup>1</sup>, Abigail Chapman<sup>2</sup>, Heather Higo<sup>2</sup>, Robyn Underwood<sup>3</sup>, Joseph Milone<sup>1</sup>, Leonard J

3 Foster<sup>2\*</sup>, M Marta Guarna<sup>4\*</sup>, David R Tarpy<sup>1\*</sup>, and Jeffery S Pettis<sup>5\*</sup>

4 1. Department of Entomology and Plant Pathology, North Carolina State University, Raleigh, North  
5 Carolina, USA

6 2. Department of Biochemistry and Molecular Biology, University of British Columbia, Vancouver,  
7 British Columbia, Canada

8 3. Department of Entomology, Pennsylvania State University, University Park, Pennsylvania, USA

9 4. Agriculture and Agri-Food Canada, Beaverlodge, Alberta, Canada

10 5. Pettis and Associates LLC, Salisbury, Maryland, USA.

11 \* Corresponding authors: [foster@msl.ubc.ca](mailto:foster@msl.ubc.ca), [marta.guarna@canada.ca](mailto:marta.guarna@canada.ca), [drtarpy@ncsu.edu](mailto:drtarpy@ncsu.edu)  
12 [pettis.jeff@gmail.com](mailto:pettis.jeff@gmail.com),

## 13 Abstract

14 All species need to reproduce to maintain viable populations, but heat stress kills sperm cells across the  
15 animal kingdom and rising frequencies of heatwaves are a threat to biodiversity. Honey bees (*Apis*  
16 *mellifera*) are globally distributed micro-livestock; therefore, they could serve as environmental  
17 biomonitors for heat-induced reductions in fertility. Here, we found that queens have two potential  
18 routes of temperature-stress exposure: within colonies and during routine shipping. Our data suggest  
19 that temperatures of 15 to 38°C are safe for queens at a tolerance threshold of 11.5% loss of sperm  
20 viability, which is the viability difference between failed and healthy queens collected from beekeepers.  
21 Heat shock activates expression of specific ATP-independent heat-shock proteins in the spermatheca,  
22 which could serve as biomarkers for heat stress. This protein fingerprint may eventually enable surveys

23 for the prevalence of heat-induced loss of sperm viability in diverse landscapes as part of a  
24 biomonitoring program.

## 25 **Introduction**

26 Climate change is threatening biodiversity around the globe<sup>1-3</sup>, and one potential driver is through heat-  
27 induced reductions in fertility<sup>4-6</sup>. The impact of heat on fertility is far-reaching in the animal kingdom,  
28 affecting mammals<sup>7-11</sup>, birds<sup>12</sup>, fish<sup>13</sup>, nematodes<sup>14</sup>, and insects<sup>4,15-21</sup>. At temperatures of 40-43 °C,  
29 spermatogenesis is compromised<sup>22</sup>, sperm viability drops<sup>4,18,19</sup>, sperm are less competitive<sup>4</sup>, and motility  
30 is compromised<sup>15,23,24</sup>. Extreme weather events such as heatwaves are increasing in frequency and  
31 severity<sup>25-27</sup>, which could have widespread effects on populations via reduced reproductive output<sup>4-6</sup>.

32 Insects and other ectothermic animals are especially vulnerable to changes in local temperatures  
33 because, unlike mammals, they are less able to thermoregulate. Insects and are critical components of  
34 ecosystems and agriculture, with economic estimates placing the global value of insect pollination at  
35 approximately €153 billion annually<sup>28</sup>. Worryingly, declines in insect populations<sup>29</sup> and pollinating  
36 species<sup>30-34</sup> have already been reported, with habitat destruction, range compression, pesticide residues,  
37 diseases, and their interactions commonly reported as potential drivers<sup>28,35,36</sup>. However, there has been  
38 relatively little research on the effects of heat on pollinating insect reproduction<sup>18,19</sup>.

39 Young honey bee queens have one brief mating period early in life, and store the sperm they acquire for  
40 the rest of their lives (up to 5 years)<sup>37</sup>. As the sole egg-layer, colony productivity directly depends on the  
41 queen's reproductive output, which in turn depends on the viability and abundance of her stored  
42 sperm<sup>18,38,39</sup>.

43 Like other insects, individual honey bees are ectothermic, but colonies can thermoregulate and maintain  
44 stable core temperatures of around 35°C in the brood nest<sup>40</sup>. Although colonies can persist in regions  
45 with extreme heat, evidence suggests that extreme ambient temperatures (38 - 46°C) are associated

46 with colony losses<sup>41</sup>. Furthermore, internal hive temperatures positively correlate with ambient  
47 temperatures above 18°C, and brood nest temperatures can rise upwards of 37°C, both under natural  
48 conditions<sup>42</sup> and during simulated heatwaves<sup>43</sup>. Hives occasionally experience spikes of > 40°C<sup>44</sup>,  
49 suggesting that queens could be vulnerable to temperature extremes even inside the hive.

50 Honey bees have excellent potential for being temperature stress biomonitors. They are a globally  
51 distributed, managed species, so they are readily available in almost any geographic region, and they are  
52 already accepted as effective biomonitors for pollution<sup>45</sup>. If we begin to observe signs of heat stress in  
53 honey bees colonies, that would signal a worrisome risk of reduced reproductive output for ectothermic  
54 species.

55 Here, we begin to explore honey bees' utility as temperature stress biomonitors. We monitored  
56 temperature fluctuations in colonies under extreme weather conditions, establishing that damaging  
57 intra-hive temperatures can occur. Next, we tested a range of temperatures and exposure durations to  
58 determine thresholds above which queen quality is likely to be compromised. We then investigated the  
59 biochemical basis of heat-induced sperm viability reduction in queens and drones using quantitative  
60 proteomics, which showed how heat stress alters protein expression of reproductive tissues. The  
61 specific set of upregulated proteins we identified may eventually serve as diagnostic tools to elucidate  
62 causes of queen failure and eventually enable regional surveys of heat stress as part of an  
63 environmental temperature biomonitoring program.

## 64 **Results and Discussion**

### 65 *Stored sperm viability of failed and healthy queens*

66 To establish how much of a reduction in sperm viability is associated with field-observable reduced  
67 reproductive output (and associated economic losses for beekeepers), we collected queens rated as  
68 'failing' (N = 58) and 'healthy' (N = 55) by beekeepers and measured the queens' stored sperm viability

69 **(Fig 1a)**. We found that the failed and healthy viability data were normally distributed (Shapiro test,  $P =$   
70 0.18 and 0.11, respectively), and that failed queens had significantly lower sperm viability (Student's  $t$   
71 test,  $P = 5.8E-06$ ,  $F = 28.16$ ), with an average drop of 11.5%. We then set an 11.5% viability drop as the  
72 tolerance threshold in subsequent experiments aimed at identifying critical temperatures beyond which  
73 queens are at risk of substantial loss of stored sperm viability.

#### 74 *Temperature exposure thresholds*

75 Previous research has shown that both cold (4°C) and hot (42°C) temperatures reduce stored sperm  
76 viability in queens<sup>18</sup>. To determine critical temperature and duration thresholds, we compared stored  
77 sperm viability across a temperature and duration gradient (5, 10, 15, 25, 38, 40 and 42°C, exposed for  
78 1, 2 or 4 h followed by a 2 d recovery period) (**Fig 2a**). Not all experimental groups' data were normally  
79 distributed (Shapiro test,  $P < 0.05$ ); therefore, we analyzed it with a Kruskal-Wallis test for non-  
80 parametric data. There was a significant effect of temperature for the 2 h ( $\chi^2 = 15.6$ ,  $P = 0.016$ ) and 4 h  
81 ( $\chi^2 = 17.9$ ,  $P = 0.0065$ ) treatments, while not at 1 h ( $\chi^2 = 9.12$ ,  $P = 0.17$ ). A Dunnett's post hoc test  
82 revealed that the only temperatures that were significantly different from the control (25°C) were the 2  
83 h, 10°C treatment ( $P = 0.045$ ) and the 4 h, 42°C treatment ( $P = 0.00057$ ), at a family-wise error rate of  $\alpha$   
84 = 0.05. The 2 h and 4 h data were then pooled and optimally fit to a cubic polynomial regression ( $R^2 =$   
85 0.092,  $P = 0.012$ ; **Fig 2b**) to find the temperature tolerance thresholds for queens, given a pre-defined  
86 maximum acceptable drop in sperm viability (11.5%). This model suggests that 15.2 – 38.2°C is the  
87 suggested "safe zone" with minimal loss of viability for 2 - 4 h exposures.

88 To test effects of heat on ejaculated sperm viability, we exposed single-drone ejaculates to 42°C for 0, 2,  
89 or 4 h, followed by a 2 d recovery period at 25°C (**Fig 2c**). These data were normally distributed (Shapiro  
90 test,  $P = 0.18$ ); therefore, we used a two-way ANOVA for analysis. We found that responses differed  
91 depending on the colony source, but heat dramatically decreased viability by 35% after both 2 and 4 h

92 (factors: time and colony,  $P_{(\text{time})} = 1.2\text{E-}07$ ,  $F_{(\text{time})} = 24$   $df_{(\text{time})} = 2$ ;  $P_{(\text{colony})} = 0.00015$ ,  $F_{(\text{colony})} = 11$ ,  $df_{(\text{colony})} =$   
93 2). Heat-shock therefore affects stored and ejaculated sperm viability at similar magnitudes. Drones  
94 could also be appropriate biomonitors of heat-stress, as their sperm is also sensitive to changes in  
95 temperature. However, drones are not as long-lived as queens and are only seasonally available.

#### 96 *Shipment and hive temperature fluctuations*

97 To document if routine shipping poses a threat of adverse temperature exposure to queens, we tracked  
98 the temperatures of eight domestic queen shipments (seven via ground transportation, one via air; **Fig**  
99 **1b**). We found that even in these shipments, which were not deliberately timed to occur during extreme  
100 weather events, one package experienced a temperature spike to 38°C and one dropped to 4°C. Since  
101 honey bees cannot adequately thermoregulate in queen cages, extreme ambient temperatures are a  
102 hazard for shipping. However, little is known about a whole colony's ability to thermoregulate in the  
103 face of extreme heat.

104 To gain a more complete picture of temperature fluctuations within colonies, we recorded temperatures  
105 throughout the brood nest (loggers placed between each frame of three 10-frame hives) during extreme  
106 heat in August in El Centro, California. The ambient temperatures, measured in the shade beneath each  
107 hive, reached up to 45°C (**Fig 1c**). In all three hives, the temperature at the two outer-most frames  
108 spiked to upwards of 40°C for 2 - 5 h, and in two of the hives, temperatures exceeded 38°C even one or  
109 two frames closer to the core. Therefore, the colony's ability to thermoregulate begins to break down in  
110 extreme heat, and queens can be vulnerable to temperature stress inside the hive.

#### 111 *Queen survival through heat stress*

112 Sturup *et al.* previously reported that drones are mortally sensitive to heat<sup>19</sup>; however, queens are  
113 typically tolerant of stressful conditions. As a biomonitor, a favourable feature would be to survive  
114 through heat stress while accumulating a physiological and molecular record of the stress event(s). We

115 compared drone, queen, and worker survival over time at 25°C, 38°C, and 42°C, confirming that drones,  
116 but not queens, are indeed mortally sensitive to heat (Log-rank test,  $P < 0.00001$ ; **Fig 3a, FigS1**). Fifty-  
117 four percent of drones died over the course of 6 h at 42°C, whereas every queen survived. We also  
118 found that drones are more sensitive to heat than workers, which have a similar lifespan to drones but  
119 are non-reproductive females.

120 In this experiment, drones and workers were from local colonies, while queens were either from a local  
121 origin or imported from Hawaii and Australia. If bees are to be used as a global biomonitor for  
122 temperature stress, an important experiment will be to determine if there are differences in survival,  
123 physiological response, or biochemical response to heat between genetic stocks that may be adapted to  
124 hotter or cooler climates.

125 Honey bees' sex-biased heat sensitivity is puzzling because drones and queens spend most of their lives  
126 inside the hive and can avoid participating in mating flights during hot weather. Therefore, they are  
127 exposed to similar environmental conditions, and based on this, one might expect them to have similar  
128 physiological tolerance thresholds. However, the ability of a colony to survive and produce reproductive  
129 individuals directly depends on the survival of individual queens (there is only one per colony), and not  
130 individual drones (hundreds per colony). Natural selection may have favoured high survivorship of  
131 queens, as evidenced by not only their long lifespan (up to 5 y) but also their high tolerance to heat  
132 stress, despite the death of their stored sperm. To our knowledge, sex biases in thermal tolerance for  
133 other social insects has not yet been investigated, as critical thermal tolerance studies have focused on  
134 workers or on male fertility alone.<sup>46-55</sup>

135 Next, we investigated sex biases in heat tolerance for two solitary insect species—fruit flies (*Drosophila*  
136 *melanogaster*) and brown marmorated stink bugs (*Halyomorpha halys*). The stink bugs have a similar  
137 body size and thermal tolerance range as honey bees<sup>56</sup> and their global distribution has expanded to

138 cover four continents, making them a potential candidate biomonitor. Fruit flies have a much smaller  
139 body size but are also distributed in laboratories around the world, so they could be candidate  
140 biomonitors too. We found that both male and female stink bugs and fruit flies readily die with heat (**Fig**  
141 **3b and c**), meaning that they cannot accumulate a physiological or molecular record of a heat stress  
142 event and have limited utility for observing impacts of heat on fertility through time. However, these  
143 data do indicate another worrying trend: that exceptionally extreme temperatures may reduce insect  
144 populations through direct kills, in addition to reducing reproductive output if they survive. We found no  
145 difference between males' and females' heat sensitivities for fruit flies and a slight opposite (female)  
146 biased heat sensitivity in stink bugs. In contrast, the high survivorship of honey bee queens makes them  
147 a good candidate biomonitor, should they possess molecular signatures indicative of heat stress when it  
148 occurs.

149 *ATP-independent sHSPs are upregulated in heat-shocked queen spermathecae*

150 Sperm longevity is enabled by molecular processes that reduce oxidative damage and maintain sperm in  
151 a quiescent metabolic state. For example, the spermatheca is a highly anaerobic environment, which  
152 helps prevent reactive oxygen species (ROS) formation<sup>57</sup>. Enzymes that further limit damage from ROS  
153 are also upregulated in mated queens compared to virgins<sup>58,59</sup>, and ROS damage leads to infertility in  
154 mammals<sup>60,61</sup>. Heat is well known to lead to oxidative stress<sup>62</sup>; therefore, we hypothesized that queens  
155 may combat heat-stress by upregulating enzymes that mitigate oxidative damage. Additionally,  
156 glyceraldehyde-3-phosphate dehydrogenase (GAPDH) has been previously implicated in stored sperm  
157 longevity, since metabolic activity measurements of stored sperm supplemented with its substrate  
158 (glyceraldehyde-3-phosphate) improved viability and produced the highest molar ratio of ATP via  
159 anaerobic catabolism<sup>57</sup>. Heat-induced changes in GAPDH expression could therefore also impact sperm  
160 viability.

161 To test these hypotheses, we compared expression of ROS mitigating enzymes (superoxide dismutases  
162 (SOD1, 2, and 3) and catalase) as well as GAPDH in heat-shocked and non-heat-shocked virgin  
163 spermathecae, mated spermathecae, and ejaculated semen. Stored sperm are reportedly  
164 transcriptionally active in queens to some degree<sup>57</sup>, although whether this is true in general has been a  
165 matter of debate across species<sup>63</sup>. It is not known with certainty whether ejaculated sperm are  
166 transcriptionally active; nevertheless, analyzing ejaculates, virgin spermathecae and mated  
167 spermathecae helped us to disentangle the male versus female origins of expression in sperm-filled,  
168 mated spermathecae. We found that heat-shock did not upregulate expression of ROS-mitigating  
169 enzymes, nor GAPDH (**Fig S2**); rather, all enzymes were consistently (but not significantly)  
170 downregulated with heat (by 10-30%). Queens must therefore employ other strategies, if any, to  
171 combat heat stress.

172 A multitude of other proteins could also be responsible for mitigating damage from heat—most  
173 obviously, members of the heat-shock protein (HSP) family<sup>24,64-66</sup>. HSPs generally function as molecular  
174 chaperones that stabilize proteins, refold damaged proteins, and prevent protein aggregation, but they  
175 can have diverse functions in specific contexts and their precise role in the honey bee spermatheca is  
176 unknown. Some HSPs contain an ATPase domain and require ATP to function (*e.g.*, HSP70s, HSP90s,  
177 HSP110s), while others operate independently of ATP (*e.g.*, HSP10s, HSP20s, HSP60s). In addition, since  
178 glyceraldehyde-3-phosphate yields the most ATP per unit via anaerobic catabolism of any tested  
179 substrate and significantly increased sperm longevity<sup>57</sup>, this implies that ATP usage economy is a critical  
180 factor for maintaining viable sperm. Therefore, we expect that ATP-independent HSPs should be  
181 upregulated with heat stress in spermathecae, and ATP-dependent HSPs (or a mix of ATP-dependent  
182 and ATP-independent HSPs) should be upregulated as a result of heat stress in other tissues. In addition,  
183 some ATP-independent short HSPs (sHSPs, typically 20-28 kDa) suppress ROS generation while  
184 preventing protein aggregates and apoptosis<sup>62,67</sup>. Since molecular processes that reduce oxidative



185 damage favour sperm longevity, we hypothesized that heat should induce expression of sHSPs in the  
186 spermatheca.

187 To determine which HSPs were upregulated with heat-shock, we compared global protein expression  
188 profiles in heat-shocked and non-heat-shocked mated and virgin spermathecae, ejaculates, and ovaries  
189 (**Fig 4a, Fig S3**). We hypothesized that the heat-shock response should both mitigate ROS production  
190 and conserve ATP in the spermatheca, but this ATP-conservation may not be as critical in the ovaries  
191 where the ATP economy is not expected to be as tightly controlled. Of the 2,778 protein groups  
192 identified in the spermathecae and ejaculates, only five were significantly up-regulated with heat (5%  
193 FDR), all of which were identified in the mated and virgin spermathecae. All five of the proteins were  
194 unique, ATP-independent sHSPs (accessions: XP\_001120194.1, XP\_001119884.1, XP\_395659.1,  
195 XP\_001120006.2, and XP\_026294937.1) (**Fig 4b**). In heat-shocked virgin spermathecae, two of the same  
196 sHSPs (XP\_395659.1 and XP\_001120006.2) were also significantly upregulated, and all mirrored the  
197 expression patterns in the spermathecae of heat-shocked mated queen (even if not significant),  
198 indicating that this is a queen-derived, and not a sperm-derived, response (**Fig 4c and d**). By contrast,  
199 the most strongly upregulated protein in heat-shocked ovaries was HSP70—an ATP-dependent HSP—  
200 and no sHSPs were upregulated in this tissue, supporting our initial hypotheses (**Fig 4e**).

201 As expected, the significantly enriched Gene Ontology (GO) terms were all related to responses to heat  
202 and stress in the spermathecae (**Fig 5a and b**). However, the only significantly enriched GO term in the  
203 semen analysis was related to the electron transfer activity (**Fig 5c**), driven by a heat-induced down-  
204 regulation of the proteins linked to this GO term (**Fig 5d**), suggesting that the sperm may be less able to  
205 produce the large amounts of ATP necessary for flagellar beating. This is consistent with the findings of  
206 Gong *et al.*, who found that heat stress at 42°C impaired mitochondrial function, reduced electron  
207 transport chain complexes' activities, and lowered total cellular ATP<sup>23</sup>. Numerous proteins (none of  
208 which were HSPs) were downregulated in heat-shocked spermathecae, but based on the GO term

209 enrichment analysis and manual inspection of their functions, it is unclear what their biological  
210 significance is. It is possible that they are degradation products of heat-killed sperm, but since these  
211 proteins were largely absent in the semen samples, we cannot confirm this hypothesis.

212 Twenty HSPs were identified in spermathecae overall and 13 were identified in the semen (**Fig 6**);  
213 however, the precise functions of specific honey bee HSPs are largely unknown. To gain insight into  
214 potential roles of the five differentially expressed HSPs we identified, we compared their sequences to  
215 annotated sequences in other species and identified putative protein domains using NCBI's basic local  
216 alignment search tool (BLAST)<sup>68</sup>. All five of the HSPs contain one or more alpha crystallin domains, which  
217 is characteristic of small HSPs (sHSPs). Four of these HSPs are within the expected molecular weight  
218 range, and one of the proteins (XP\_026294937.1) is predicted to be 56.7 kDa (and contains two alpha  
219 crystallin domains instead of one), highlighting that HSPs should not necessarily be categorized based on  
220 molecular weight alone. All five of the honey bee sHSPs are orthologous to the *D. melanogaster* gene  
221 *l(2)efl* (also known as CRYAB). In *Drosophila*, upregulation of this gene causes increased lifespan of  
222 individual flies<sup>69</sup>. CRYAB and other sHSPs are highly conserved in both vertebrates and invertebrates,<sup>70</sup>  
223 but is by far the best studied in human. In humans, sHSP upregulation is associated with anti-apoptotic  
224 properties, as well as mitigating ROS production<sup>62,66,71,72</sup>. Their up-regulation in heat-shocked testes is  
225 thought to help compensate for the damaging effects of heat<sup>71</sup>, and we speculate that they are playing a  
226 similar role in the spermathecae. Queens with strongly up-regulated sHSPs may therefore be better able  
227 to counter-act ROS production, sperm death, and ultimately maintain longevity.

228 Other researchers have suggested that in mammals, some ATP-dependent HSPs (*e.g.*, HSP70s and  
229 HSP90s) may be important for maintaining male fertility via quality control of sperm<sup>66,73</sup>. Unlike sHSPs,  
230 these HSPs appear to be pro-apoptotic factors and could theoretically help prevent damaged sperm  
231 from being able to fertilize an egg. Neither queen spermathecae nor drone ejaculates provide evidence  
232 supporting this strategy of quality control in honey bees; in this experiment, none of the HSPs that were

233 up-regulated with heat in spermathecae or semen contained an ATP-binding nor ATPase domain, which  
234 are characteristics of HSP70s and HSP90s but not the sHSPs (**Figure 5 and 6**)<sup>66</sup>. Rather, HSP70 was only  
235 upregulated in the ovaries, which does not directly participate in sperm maintenance.

236 In mammals, sHSPs are upregulated in testes after heating, but so are ATP-consuming proteins like  
237 HSP105, HSP70-1, HSP70-2, and HSP90<sup>74-76</sup>. We speculate that the energetic cost associated with  
238 ensuring high sperm quality is advantageous in mammals because it helps reduce the risk of an egg  
239 going unfertilized, which would produce no progeny. However, the honey bee's differing strategy of  
240 upregulating only the ATP-independent sHSPs in the spermatheca is consistent with a tightly controlled  
241 ATP usage economy, as well as their haplodiploid sex determination system: for honey bees, an  
242 unfertilized egg develops as a drone, rather than being non-viable. Therefore, honey bees may have  
243 experienced little selection for an ATP-consuming quality control measure, and instead combat heat  
244 damage to sperm in an ATP-conservative manner. The ATP-independent sHSPs have the dual purpose of  
245 also limiting oxidative damage and conserving ATP. The significant enrichment for differentially  
246 expressed proteins involved in multiple nucleotide metabolic processes, including ATP, in the transition  
247 from virgin to mated spermathecae (**Fig S3**) supports the notion that regulating ATP production and  
248 consumption is critical for maintaining stored sperm viability.

249 Moreover, analyzing heat-shocked mated queen ovaries revealed that HSP70—an ATP-dependent HSP—  
250 was uniquely upregulated in this tissue (**Fig 5 and 6**). This observation is consistent with selection for  
251 ATP-consuming quality control mechanisms when a failed fertilization event fails to produce offspring (in  
252 this case, when a non-viable egg meets a viable sperm). Overall, these data indicate that upregulation of  
253 specific sHSPs is not a general indicator of cellular stress, since it was not observed in the ovaries.  
254 Indeed, the ovaries appear not to express most sHSPs at all, whereas they were abundantly expressed  
255 even in non-heat-shocked spermathecae.

256 Finally, we compared protein expression in spermathecae, fat bodies, and ovaries between 11 queens  
257 that failed due to unknown causes and 11 age-matched, apiary-matched healthy queens. We identified  
258 1,219, 1,640, and 1,782 proteins, respectively, but did not find any significant expression differences at  
259 10% FDR, indicating that there is not one universal signature of failure (**Fig S4**). Rather, we suspect that  
260 different stressors alter protein expression in these tissues in different ways, and that no significant  
261 differences were found because it is highly unlikely that the queens all failed from the same cause.

262 We propose that the sHSP response of the spermathecae may serve as a post-queen-failure biomarker  
263 of heat stress which could help diagnose causes of colony failure in the field. Future experiments should  
264 include a blind heat-shock trial to determine a) if previously heat-shocked queens can be reliably  
265 distinguished from non-heat-shocked queens based on these biomarkers, b) how long the heat-shock  
266 proteomic signature lasts, and c) if other stressors produce proteomic signatures that overlap with the  
267 heat-shock signature.

268

## 269 **Conclusion**

270 Our experiments show that temperature stress deeply damages both stored and ejaculated honey bee  
271 sperm viability, that queens are vulnerable to temperature changes both in colonies and during  
272 transport, and that temperatures ranging between 15°C and 38°C for 2 - 4 h are generally safe for  
273 queens. Honey bees have a strong sex bias in heat tolerance, with females being highly tolerant—a bias  
274 which does not exist in the two solitary insect species we tested (*H. halys* and *D. melanogaster*). Future  
275 research should investigate if this sex-biased heat tolerance is also present in other Hymenopterans in  
276 order to better understand the evolutionary origin. Upon heat-shock, queens upregulate ATP-  
277 independent HSPs in their spermathecae, which both minimizes ATP consumption and could provide  
278 beneficial anti-apoptotic properties. In contrast, HSP70 (an ATP-consuming HSP) is upregulated in

279 ovaries. Once validated in field trials, these protein signatures could serve as biomarkers for heat stress  
280 enabling longitudinal surveys for the prevalence of heat-induced loss of sperm viability in diverse  
281 landscapes as part of a biomonitoring program.

## 282 **Methods**

### 283 *Sperm viability assays*

284 Honey bee queens (Kona Queens supplied in a single shipment) were treated at one of five different  
285 temperatures (5, 10, 15, 25, 38, 40, and 42°C) for 1, 2, or 4 hours, then held at 25°C for 2 d. The  
286 temperature range was chosen because previous research showed that 4°C and 8°C were sufficiently  
287 cold to reduce sperm viability, and that 40 - 42°C was sufficiently hot.<sup>18</sup> Therefore, more temperatures  
288 were chosen at the cold (5, 10, and 15°C) and hot (38, 40, and 42°C) extremes to try to capture the  
289 critical point at which the viability begins to drop. We chose 25°C as the control temperature, rather  
290 than 35°C, because these queens were obtained from a commercial supplier and queens are not held at  
291 hive temperature during transport. While a 35°C treatment group would be an appropriate control, it  
292 would not be meaningful in these circumstances.

293 Fourteen queens (replicates) were included in the 25°C treatment (negative control), whereas 8 or 9  
294 queens were included in all other temperatures and exposure durations (see **Table 1** for specific  
295 replication information). Following this, queens were beheaded, and their spermathecae were dissected  
296 with fine forceps. The spermathecae were gently agitated with a pipet tip in 100 µl Buffer D (17 mM D-  
297 glucose, 54 mM KCl, 25 mM NaHCO<sub>3</sub>, 83 mM Na<sub>3</sub>C<sub>6</sub>H<sub>5</sub>O<sub>7</sub>) to break them open and release the sperm.  
298 Sperm viability was determined using a live/dead sperm viability kit (Thermo) following the protocols of  
299 Collins and Donoghue<sup>77</sup>. Briefly, the SYBR14 dye was diluted 1:9 in DMSO. Two microlitres of the diluted  
300 SYBR14 dye and 4 µl of propidium iodide were gently mixed with the sperm and incubated for 15  
301 minutes in the dark. Two microlitres of the mixture was then added to a glass microscope slide and

302 viewed under a fluorescent microscope. Live (green) and red (dead) sperm were counted until 100 cells  
303 were observed, covering multiple fields of view. Unless otherwise reported, all statistical analyses were  
304 performed in R (v3.5.1). First, the data were tested for normality using a Shapiro test. The data was not  
305 normally distributed, we used a non-parametric test (Kruskal Wallis) to investigate the effects of  
306 temperature on viability for each duration separately. When a significant effect of temperature was  
307 identified, we performed a post-hoc Dunnett's test to identify significant contrasts to the 25°C control.  
308 To identify the best-fitting linear model, we pooled the 2 h and 4 h data and performed linear  
309 regressions using temperature as a continuous variable, testing exponents 1 - 4 to identify the optimal  
310 fit (highest R<sup>2</sup>).

311 Drones were harvested from three different colonies headed by Kona queens with unknown  
312 relatedness. The colonies were kept in Beaverlodge, Alberta. Semen was collected with glass capillaries  
313 according to the methods of Collins and Donoghue<sup>77</sup>. Briefly, we pinched drone abdomens with a rolling  
314 motion from the anterior to posterior end to expel the endophallus and semen. The semen was  
315 collected by first filling glass capillaries with 1 µl Buffer D, then drawing up the semen via capillary action  
316 (avoiding the white mucus secretions). Capillaries were then filled with a further 1 µl of Buffer D to  
317 prevent the sample from drying out, and both ends were wrapped with parafilm. This technique  
318 typically yielded 0.5-1.0 µl of semen per sample. Semen samples were then heat-shocked at 42°C for 0,  
319 2, or 4 h, then allowed to recover at 25°C for 2 d (see **Table 2** for replication information). We chose a  
320 lower temperature for semen recovery because ejaculated drone semen can be maintained at room  
321 temperature for several weeks while retaining high viability<sup>78</sup>. Viability assays for these semen samples  
322 was performed following the same methods as for spermathecae. Data were analyzed by a Shapiro test  
323 and Levene's median test to confirm normal distribution and evaluate the validity of the assumption of  
324 equal variance, respectively. The data passed both tests, so a two-way ANOVA (factors: time, colony)  
325 was performed, followed by a Tukey HSD test.

326

327 *Recording temperatures during shipments*

328 We arranged seven shipments of locally produced (BC) queens via ground transportation from Kettle  
329 Valley Queens, Nicola Valley Honey, Wild Antho, Campells Gold Honey, Heather Meadows Honey Farm,  
330 Six Legs Good Apiaries, and Wildwood Queens (located in Grand Forks, Merrit, Armstrong, Abbotsford,  
331 Telka, Surrey, and Powell River, respectively) to the University of British Columbia, Vancouver, in the  
332 summer of 2019. These queens (7-8 queens per shipment) were all considered to be “good” queens by  
333 the donating bee breeders based on their laying pattern. These queens cumulatively make up the  
334 “healthy” queen cohort (N = 55 queens total). An additional shipment travelled from Edmonton to UBC  
335 Vancouver via air freight. All shipments were accompanied by two temperature data loggers (B-series  
336 WatchDog loggers, Spectrum Technologies) set to record the temperature every 10 minutes for the  
337 duration of the shipment.

338

339 *Failed queen viability survey*

340

341 We solicited samples of failed queens, as rated by beekeepers, from throughout BC in the summer of  
342 2019. Reported reasons for designating the queens as ‘failed’ included poor brood pattern, drone laying,  
343 poor population build-up, disease symptoms, injury, small size, and worker rejection. These queens (N =  
344 58) make up the “failed” queen cohort. We measured the sperm viability of all failed and healthy queens  
345 using the same live/dead sperm staining kit as described under “Sperm Viability Assays.”

346

347 *Hive temperature recording*

348

349 To record the internal and external temperatures of colonies, we placed temperature loggers inside  
350 three standard, 10-frame colonies in El Centro, California, from August 23<sup>rd</sup> to September 6<sup>th</sup>, 2017. The  
351 hottest day (the data shown) was August 26<sup>th</sup>. Loggers were set to record the temperature every 10  
352 minutes and were placed between each frame of the hive. Hives consisted of 10 deep frames in a single

353 wooden Langstroth brood box with a medium depth box on top of the brood chamber and a migratory  
354 wooden cover. The ambient temperatures were recorded with a temperature logger placed in the shade  
355 beneath each hive.

356  
357 *Heat-shock survival*

358 For honey bee heat-shock tests, drones and workers were collected by retrieving a frame of capped  
359 brood from a hive and allowing the bees to emerge in an incubator. Newly emerged bees were marked  
360 with a paint pen and returned to the colony to age for one week, at which time they were recaptured  
361 and caged in California mini cages. For drone heat-shock tests, one drone was added per cage along with  
362 malleable candy (icing sugar-based) and five worker attendants. A total of 199 drones were caged in the  
363 following experimental groups: 42°C heat (50), 38°C heat (50), and 25°C (99) for six hours (all at 60%  
364 relative humidity). Every hour, the number of drones that perished was recorded. Worker heat stress  
365 tests were conducted independently with six workers per cage (54 workers per group) held at 42°C and  
366 25°C.

367 Queens were from a variety of sources (local, Hawaii, and Australia) and their ages ranged from  
368 approximately 3 - 5 weeks. They were kept in California mini-cages with five worker attendants each and  
369 held at 42°C, 38°C, or 25°C for either 1, 2, or 4 h as part of other experiments (for viability  
370 measurements and proteomics). Relative humidity varied between 40 and 80%, but this did not have an  
371 effect of survival (100% of queens survived in both cases). Eight queens were held at 42°C for 6 h at a  
372 constant 60% relative humidity specifically for survival analysis. See **Fig S1** for sample sizes and risk  
373 tables for each treatment group. No queens died in these tests; therefore it was not necessary to  
374 account for geographic origin in statistical analyses.

375 Male and female 3- to 10-day-old Canton S wild type fruit flies were held at 38°C and 25°C for six hours  
376 in *Drosophila* vials with media (50 males and 50 females). Loss of motility was recorded every hour. We



377 used this as the endpoint because fruit flies will become paralyzed with heat, but recover motility after  
378 several hours (in some cases, overnight) at cooler temperatures. Control female flies were maintained  
379 for a further week after the experiment to confirm that the majority of them had successfully mated  
380 prior to the heat stress tests.

381 Male and female stink bugs were reared in the laboratory according to standard protocols<sup>79</sup>. Stink bugs  
382 which transitioned from nymphs to adults 3 - 7 d prior were transferred to ventilated 500 ml volume  
383 plastic cages with a piece of moist paper towel (3 - 6 stink bugs per cage). They were heat stressed at  
384 42°C (55 females and 41 males) or held at 25°C (36 females and 24 males) for 6 h. Only mated females  
385 carrying eggs were included in the experiment, as determined by post-stress dissection.

386 In all cases, Kaplan-Meier survival curves were generated in R and compared using log-rank tests. See **Fig**  
387 **S1** for risk tables and sample size information for survival tests for all species.

### 388 *Heat-shock for proteomics*

389 Our experimental design for the proteomics experiments was to compare heat-shocked and non heat-  
390 shocked treatments of three tissues: virgin spermathecae, mated spermathecae, and ejaculated semen  
391 (N = 10 each for all but the semen, which was N = 5 where each N was a pooled sample of five drones  
392 from one colony). For the mated spermathecae, expression differences induced by heat-shock would be  
393 the sum of any expression differences that may have occurred in the queen's cells and in the sperm  
394 cells. The virgin spermathecae, however, do not contain sperm so that response to heat-shock is purely  
395 from the queen.

396 Honey bee colonies were maintained in an apiary at the University of British Columbia. During the  
397 summer of 2018, 40 queens were reared from a single colony of local origin and half were allowed to  
398 open mate, while the other half were kept as virgins in plastic queen cages. Two weeks after emergence,  
399 the virgin queens were given two, eight-minute carbon dioxide treatments on sequential days, then re-

400 introduced to their nucleus colonies. This process stimulates virgin queens to begin laying<sup>80</sup>, and we  
401 conducted these treatments in order to minimize the physiological differences between virgin and  
402 mated queens.

403 Virgin and mated queens were retrieved from their nucleus colonies and half of each (10) were  
404 subjected to heat-shock (42°C, 2 h), and then maintained at 30°C for 2 d. The other half were held only  
405 at 30°C for 2 d. Four to six weeks after mating, the queens were anesthetized with carbon dioxide,  
406 beheaded, then their spermathecae were removed with fine forceps. Both ovaries were also removed  
407 and weighed.

408 During the same summer, 200 drones from a different colony in the same apiary were collected and  
409 maintained in the laboratory overnight at ambient temperature with excess syrup (50% sucrose). The  
410 next day, semen was harvested with glass capillaries according to the methods described above.

411 Because many drones were not sexually mature, 60 semen samples (out of the 200 drones) were  
412 collected. Capillaries were placed in petri dishes and half (30) were heat-shocked as described above,  
413 then kept at 25°C for 2 d. The other half were only kept at 25°C for 2 d. Ten samples from each  
414 experimental group were used for sperm viability assays as described above.

#### 415 *Proteomics sample preparation*

416 Semen and spermatheca samples were homogenized in 2 ml screw-cap tubes containing 100 µl of lysis  
417 buffer (6 M guanidinium chloride, 100 mM Tris, pH 8.5) and four ceramic beads. The homogenizer  
418 (Precellys 24, Bertin Instruments) was set to 6,500 s<sup>-1</sup> for 30 s, then samples were centrifuged (16,000  
419 rcf, 10 min, 4°C) to remove debris. Supernatants were transferred to a new tube and diluted 1:1 with  
420 dH<sub>2</sub>O. Protein was precipitated by adding four volumes of ice-cold acetone and incubating overnight at -  
421 20°C. The precipitated protein was pelleted and washed twice with 500 µl of 80% acetone, then the

422 pellet was allowed to air dry (ca. 5 min) prior to solubilization in 50  $\mu$ l of digestion buffer (6 M urea, 2 M  
423 thiourea).

424 Approximately 25 micrograms of protein were reduced (0.5  $\mu$ g dithiothreitol, 20 min), alkylated (2.5  $\mu$ g  
425 iodoacetamide, 30 min, dark), and digested (0.5  $\mu$ g Lys-C for 3 h, then 0.5  $\mu$ g trypsin overnight). Digested  
426 peptides were acidified with one volume of 1% trifluoroacetic acid and desalted with high-capacity  
427 STAGE tips as previously described<sup>81</sup>. Eluted samples were dried (SpeedVac, Eppendorf, 45 min) and  
428 resuspended in Buffer A (0.1% formic acid). Peptide concentrations were determined using a NanoDrop  
429 (Thermo, 280 nm) and sample orders were randomized for liquid chromatography-tandem mass  
430 spectrometry (LC-MS/MS) analysis.

#### 431 *LC-MS/MS data acquisition and analysis*

432 Peptides (0.5  $\mu$ g for each sample) were injected on an EASY-nLC 1000 liquid chromatography system  
433 (Thermo) coupled to an Impact II Q-TOF mass spectrometer (Bruker), essentially as previously  
434 described<sup>82</sup>. The LC system included a fused-silica (5  $\mu$ m Aqua C18 particles (Phenomenex)) fritted 2 cm  
435 trap column connected to a 50 cm analytical column packed with ReproSil C18 (3  $\mu$ m C18 particles (Dr.  
436 Maisch)). The separation gradient ran from 5% to 35% Buffer B (80% acetonitrile, 0.1% formic acid) over  
437 90 min, followed by a 15 min wash at 95% Buffer B (flow rate: 250  $\mu$ L/min). The instrument parameters  
438 were: scan from 150 to 2200 m/z, 100  $\mu$ s transient time, 10  $\mu$ s prepulse storage, 7 eV collision energy,  
439 1500 Vpp Collision RF, a +2 default charge state, 18 Hz spectral acquisition rate, 3.0 s cycle time, and the  
440 intensity threshold was 250 counts.

441 Mass spectrometry data were searched using MaxQuant (v1.5.3.30) using default parameters, except  
442 “match between runs” was enabled. Peptide spectral matches, peptide identifications and protein  
443 identifications were controlled at 1% false discovery rates (FDRs). The protein search database was the  
444 NCBI Identical Protein Groups database for *Apis mellifera* (downloaded Nov. 1<sup>st</sup>, 2018; 21,425 entries)

445 plus all honey bee viral proteins contained within NCBI (a further 508 entries). Differential expression  
446 analysis was performed in Perseus (v1.6.1.1) essentially as previously described<sup>82</sup>. Histograms of protein  
447 counts across LFQ intensities were first inspected for normality. Then proteins differentially expressed  
448 between heat-shocked and non-heat-shocked samples, as well as among tissues (semen, virgin  
449 spermathecae, and mated spermathecae), were identified using two-tailed t-tests and an ANOVA,  
450 respectively. Only P values surviving the 10% FDR threshold (permutation-based method) were  
451 considered significant.

#### 452 *GO term enrichment analysis*

453 Gene Ontology (GO) terms were retrieved using BLAST2GO (v4.1.9) and subsequent enrichment analyses  
454 were conducted using ErmineJ<sup>83</sup>. We used the gene score resampling (GSR) method (with P values as  
455 scores). Unlike conventional over-representation analyses, this method does not depend on submitting  
456 a ‘hit list,’ the composition of which is sensitive to arbitrary significance cut-offs. Rather, the GSR  
457 method uses p-values as a continuous variable and looks for GO terms that are enriched in proteins with  
458 low p-values along the continuum. More documentation about the GSR method and ErmineJ can be  
459 found at <https://erminej.msl.ubc.ca/help/tutorials/running-an-analysis-resampling/>. Enrichment false  
460 discovery rates were controlled to 10% using the Benjamini-Hochberg correction method. Protein  
461 multifunctionality (MF) scores were also computed in ErmineJ based on the number of different GO  
462 terms with which the protein is associated. This process generates an “MF-corrected P value” (also  
463 limited to 10% FDR), which is the enrichment P value after correcting for multifunctionality.

#### 464 *Field-failed queens*

465 Age-matched failing and healthy queens (11 each) were obtained from a research apiary in  
466 Pennsylvania. Queens were rated as ‘failing’ if they had ceased to lay eggs, were ‘drone layers’ (*i.e.*,  
467 were not laying fertilized female eggs), or had otherwise inferior brood patterns. Queens were frozen on

468 dry ice in the field and stored at -80°C until spermatheca and ovary dissection. Proteomics analysis was  
469 performed as described above. Sample handlers were blind to queen groups until all proteomics data  
470 was acquired. Differential expression analysis was performed in Perseus as described above.

## 471 References

- 472 1 Bellard, C., Bertelsmeier, C., Leadley, P., Thuiller, W. & Courchamp, F. Impacts of climate change  
473 on the future of biodiversity. *Ecol Lett* **15**, 365-377, doi:10.1111/j.1461-0248.2011.01736.x  
474 (2012).
- 475 2 Thomas, C. D. *et al.* Extinction risk from climate change. *Nature* **427**, 145-148,  
476 doi:10.1038/nature02121 (2004).
- 477 3 Bálint, M. *et al.* Cryptic biodiversity loss linked to global climate change. *Nature Climate Change*  
478 **1**, 313 (2011).
- 479 4 Sales, K. *et al.* Experimental heatwaves compromise sperm function and cause transgenerational  
480 damage in a model insect. *Nat Commun* **9**, 4771, doi:10.1038/s41467-018-07273-z (2018).
- 481 5 Walsh, B. S. *et al.* The Impact of Climate Change on Fertility. *Trends Ecol Evol*,  
482 doi:10.1016/j.tree.2018.12.002 (2019).
- 483 6 Zeh, J. A. *et al.* Degrees of disruption: projected temperature increase has catastrophic  
484 consequences for reproduction in a tropical ectotherm. *Global Change Biology* **18**, 1833-1842  
485 (2012).
- 486 7 Jannes, P. *et al.* Male subfertility induced by acute scrotal heating affects embryo quality in  
487 normal female mice. *Hum Reprod* **13**, 372-375 (1998).
- 488 8 Pérez-Crespo, M., Pintado, B. & Gutiérrez-Adán, A. Scrotal heat stress effects on sperm viability,  
489 sperm DNA integrity, and the offspring sex ratio in mice. *Mol Reprod Dev* **75**, 40-47,  
490 doi:10.1002/mrd.20759 (2008).
- 491 9 Setchell, B. The effects of heat on the testes of mammals. *Anim Reprod* **3**, 81-91 (2006).
- 492 10 Thonneau, P., Bujan, L., Multigner, L. & Mieusset, R. Occupational heat exposure and male  
493 fertility: a review. *Hum Reprod* **13**, 2122-2125 (1998).
- 494 11 Yaeram, J., Setchell, B. P. & Maddocks, S. Effect of heat stress on the fertility of male mice in vivo  
495 and in vitro. *Reprod Fertil Dev* **18**, 647-653 (2006).
- 496 12 Hurley, L. L., McDiarmid, C. S., Friesen, C. R., Griffith, S. C. & Rowe, M. Experimental heatwaves  
497 negatively impact sperm quality in the zebra finch. *Proc Biol Sci* **285**,  
498 doi:10.1098/rspb.2017.2547 (2018).
- 499 13 Breckels, R. D. & Neff, B. D. The effects of elevated temperature on the sexual traits,  
500 immunology and survivorship of a tropical ectotherm. *J Exp Biol* **216**, 2658-2664,  
501 doi:10.1242/jeb.084962 (2013).
- 502 14 Harvey, S. C. & Viney, M. E. Thermal variation reveals natural variation between isolates of  
503 *Caenorhabditis elegans*. *J Exp Zool B Mol Dev Evol* **308**, 409-416, doi:10.1002/jez.b.21161 (2007).
- 504 15 Porcelli, D., Gaston, K. J., Butlin, R. K. & Snook, R. R. Local adaptation of reproductive  
505 performance during thermal stress. *J Evol Biol* **30**, 422-429, doi:10.1111/jeb.13018 (2017).
- 506 16 Gasparini, C., Lu, C., Dingemans, N. J. & Tunii, C. Paternal-effects in a terrestrial ectotherm are  
507 temperature dependent but no evidence for adaptive effects. *Functional Ecology* **32**, 1011-1021  
508 (2018).
- 509 17 Saxena, B., Sharma, P., Thappa, R. & Tikku, K. Temperature induced sterilization for control of  
510 three stored grain beetles. *Journal of Stored Products Research* **28**, 67-70 (1992).

- 511 18 Pettis, J. S., Rice, N., Joselow, K., vanEngelsdorp, D. & Chaimanee, V. Colony Failure Linked to  
512 Low Sperm Viability in Honey Bee (*Apis mellifera*) Queens and an Exploration of Potential  
513 Causative Factors. *PLoS One* **11**, e0147220, doi:10.1371/journal.pone.0147220 (2016).
- 514 19 Stürup, M., Baer-Imhoof, B., Nash, D. R., Boomsma, J. J. & Baer, B. When every sperm counts:  
515 factors affecting male fertility in the honeybee *Apis mellifera*. *Behavioral Ecology* **24**, 1192-1198  
516 (2013).
- 517 20 Zizzari, Z. V. & Ellers, J. Effects of exposure to short-term heat stress on male reproductive  
518 fitness in a soil arthropod. *Journal of insect physiology* **57**, 421-426 (2011).
- 519 21 David, J. R. *et al.* Male sterility at extreme temperatures: a significant but neglected  
520 phenomenon for understanding *Drosophila* climatic adaptations. *J Evol Biol* **18**, 838-846,  
521 doi:10.1111/j.1420-9101.2005.00914.x (2005).
- 522 22 Hansen, P. J. Effects of heat stress on mammalian reproduction. *Philos Trans R Soc Lond B Biol*  
523 *Sci* **364**, 3341-3350, doi:10.1098/rstb.2009.0131 (2009).
- 524 23 Gong, Y. *et al.* Heat Stress Reduces Sperm Motility via Activation of Glycogen Synthase Kinase-3 $\alpha$   
525 and Inhibition of Mitochondrial Protein Import. *Frontiers in physiology* **8**, 718 (2017).
- 526 24 Yang, R. C., Shen, M. R., Chiang, P. H., Yang, S. L. & Chen, S. S. A possible role of heat shock  
527 proteins in human sperm motility. *Gaoxiong Yi Xue Ke Xue Za Zhi* **8**, 299-305 (1992).
- 528 25 Luber, G. & McGeehin, M. Climate change and extreme heat events. *Am J Prev Med* **35**, 429-435,  
529 doi:10.1016/j.amepre.2008.08.021 (2008).
- 530 26 Hayhoe, K., Sheridan, S., Kalkstein, L. & Greene, S. Climate change, heat waves, and mortality  
531 projections for Chicago. *Journal of Great Lakes Research* **36**, 65-73 (2010).
- 532 27 Meehl, G. A. & Tebaldi, C. More intense, more frequent, and longer lasting heat waves in the  
533 21st century. *Science* **305**, 994-997, doi:10.1126/science.1098704 (2004).
- 534 28 Potts, S. G. *et al.* Global pollinator declines: trends, impacts and drivers. *Trends Ecol Evol* **25**,  
535 345-353, doi:10.1016/j.tree.2010.01.007 (2010).
- 536 29 Hallmann, C. A. *et al.* More than 75 percent decline over 27 years in total flying insect biomass in  
537 protected areas. *PLoS One* **12**, e0185809, doi:10.1371/journal.pone.0185809 (2017).
- 538 30 Cameron, S. A. *et al.* Patterns of widespread decline in North American bumble bees. *Proc Natl*  
539 *Acad Sci U S A* **108**, 662-667, doi:10.1073/pnas.1014743108 (2011).
- 540 31 Rasmont, P. & Mersch, P. First estimation of faunistic drift by bumblebees of Belgium  
541 (Hymenoptera: Apidae). *Annalen van de Koninklijke Belgische Vereniging voor Dierkunde* (1988).
- 542 32 Winfree, R., Aguilar, R., Vázquez, D. P., LeBuhn, G. & Aizen, M. A. A meta-analysis of bees'  
543 responses to anthropogenic disturbance. *Ecology* **90**, 2068-2076 (2009).
- 544 33 Ricketts, T. H. *et al.* Landscape effects on crop pollination services: are there general patterns?  
545 *Ecol Lett* **11**, 499-515, doi:10.1111/j.1461-0248.2008.01157.x (2008).
- 546 34 Biesmeijer, J. C. *et al.* Parallel declines in pollinators and insect-pollinated plants in Britain and  
547 the Netherlands. *Science* **313**, 351-354, doi:10.1126/science.1127863 (2006).
- 548 35 Whitehorn, P. R., Tinsley, M. C., Brown, M. J., Darvill, B. & Goulson, D. Genetic diversity, parasite  
549 prevalence and immunity in wild bumblebees. *Proceedings of the Royal Society of London B:*  
550 *Biological Sciences*, rspb20101550 (2010).
- 551 36 McCallum, H. & Dobson, A. Disease, habitat fragmentation and conservation. *Proc Biol Sci* **269**,  
552 2041-2049, doi:10.1098/rspb.2002.2079 (2002).
- 553 37 Baer, B., Collins, J., Maalaps, K. & den Boer, S. P. Sperm use economy of honeybee (*Apis*  
554 *mellifera*) queens. *Ecol Evol* **6**, 2877-2885, doi:10.1002/ece3.2075 (2016).
- 555 38 Delaney, D. A., Keller, J. J., Caren, J. R. & Tarpy, D. R. The physical, insemination, and  
556 reproductive quality of honey bee queens (*Apis mellifera* L.). *Apidologie* **42**, 1-13 (2011).

- 557 39 Tarpy, D. R. & Olivarez Jr, R. Measuring sperm viability over time in honey bee queens to  
558 determine patterns in stored-sperm and queen longevity. *Journal of Apicultural Research* **53**,  
559 493-495 (2014).
- 560 40 Stabentheiner, A., Kovac, H. & Brodschneider, R. Honeybee colony thermoregulation—regulatory  
561 mechanisms and contribution of individuals in dependence on age, location and thermal stress.  
562 *PLoS One* **5**, e8967 (2010).
- 563 41 Alattal, Y. Impact of temperature extremes on survival of indigenous and exotic honey bee  
564 subspecies, *Apis mellifera*, under desert and semiarid climates. *Bulletin of Insectology* **68**, 219-  
565 222 (2015).
- 566 42 Fahrenheit, L., Lamprecht, I. & Schricker, B. Thermal investigations of a honey bee colony:  
567 thermoregulation of the hive during summer and winter and heat production of members of  
568 different bee castes. *Journal of Comparative Physiology B* **159**, 551-560 (1989).
- 569 43 Bordier, C. *et al.* Colony adaptive response to simulated heat waves and consequences at the  
570 individual level in honeybees (*Apis mellifera*). *Sci Rep* **7**, 3760, doi:10.1038/s41598-017-03944-x  
571 (2017).
- 572 44 Villa, J. D., Gentry, C. & Taylor, O. R. Preliminary observations on thermoregulation, clustering,  
573 and energy utilization in African and European honey bees. *Journal of the Kansas Entomological*  
574 *Society* **60**, 4-14 (1987).
- 575 45 Smith, K. E. *et al.* Honey as a biomonitor for a changing world. *Nature Sustainability* **2**, 223  
576 (2019).
- 577 46 Mitchell, J. D., Hewitt, P. & Van Der Linde, T. D. K. Critical thermal limits and temperature  
578 tolerance in the harvester termite *Hodotermes mossambicus* (Hagen). *Journal of Insect*  
579 *Physiology* **39**, 523-528 (1993).
- 580 47 Clémencet, J., Cournault, L., Odent, A. & Doums, C. Worker thermal tolerance in the  
581 thermophilic ant *Cataglyphis cursor* (Hymenoptera, Formicidae). *Insectes sociaux* **57**, 11-15  
582 (2010).
- 583 48 Baudier, K. M., Mudd, A. E., Erickson, S. C. & O'Donnell, S. Microhabitat and body size effects on  
584 heat tolerance: implications for responses to climate change (army ants: Formicidae,  
585 Ecitoninae). *J Anim Ecol* **84**, 1322-1330, doi:10.1111/1365-2656.12388 (2015).
- 586 49 Chirault, M. *et al.* A combined approach to heat stress effect on male fertility in *Nasonia*  
587 *vitripennis*: from the physiological consequences on spermatogenesis to the reproductive  
588 adjustment of females mated with stressed males. *PLoS One* **10**, e0120656,  
589 doi:10.1371/journal.pone.0120656 (2015).
- 590 50 Hidalgo, K., Beaugeard, E., Renault, D., Dedeine, F. & Lécureuil, C. Physiological and biochemical  
591 responses to thermal stress vary among genotypes in the parasitic wasp *Nasonia vitripennis*. *J*  
592 *Insect Physiol* **117**, 103909, doi:10.1016/j.jinsphys.2019.103909 (2019).
- 593 51 Macías-Macías, J. O. *et al.* Comparative temperature tolerance in stingless bee species from  
594 tropical highlands and lowlands of Mexico and implications for their conservation  
595 (Hymenoptera: Apidae: Meliponini). *Apidologie* **42**, 679-689 (2011).
- 596 52 Oberg, E., Del Toro, I. & Pelini, S. Characterization of the thermal tolerances of forest ants of  
597 New England. *Insectes sociaux* **59**, 167-174 (2012).
- 598 53 Verble-Pearson, R. M., Gifford, M. E. & Yanoviak, S. P. Variation in thermal tolerance of North  
599 American ants. *Journal of thermal biology* **48**, 65-68 (2015).
- 600 54 Andrew, N. R., Hart, R. A., Jung, M.-P., Hemmings, Z. & Terblanche, J. S. Can temperate insects  
601 take the heat? A case study of the physiological and behavioural responses in a common ant,  
602 *Iridomyrmex purpureus* (Formicidae), with potential climate change. *Journal of Insect Physiology*  
603 **59**, 870-880 (2013).

- 604 55 Abou-Shaara, H. F., Al-Ghamdi, A. A. & Mohamed, A. A. Tolerance of two honey bee races to  
605 various temperature and relative humidity gradients.
- 606 56 Scaccini, D., Duso, C. & Pozzebon, A. Lethal Effects of High Temperatures on Brown Marmorated  
607 Stink Bug Adults before and after Overwintering. *Insects* **10**, doi:10.3390/insects10100355  
608 (2019).
- 609 57 Paynter, E. *et al.* Insights into the molecular basis of long-term storage and survival of sperm in  
610 the honeybee (*Apis mellifera*). *Sci Rep* **7**, 40236, doi:10.1038/srep40236 (2017).
- 611 58 Collins, A., Williams, V. & Evans, J. Sperm storage and antioxidative enzyme expression in the  
612 honey bee, *Apis mellifera*. *Insect molecular biology* **13**, 141-146 (2004).
- 613 59 Weirich, G. F., Collins, A. M. & Williams, V. P. Antioxidant enzymes in the honey bee, *Apis*  
614 *mellifera*. *Apidologie* **33**, 3-14 (2002).
- 615 60 Wagner, H., Cheng, J. W. & Ko, E. Y. Role of reactive oxygen species in male infertility: An  
616 updated review of literature. *Arab J Urol* **16**, 35-43, doi:10.1016/j.aju.2017.11.001 (2018).
- 617 61 Agarwal, A., Virk, G., Ong, C. & du Plessis, S. S. Effect of oxidative stress on male reproduction.  
618 *The world journal of men's health* **32**, 1-17 (2014).
- 619 62 Ikwegbue, P. C., Masamba, P., Oyinloye, B. E. & Kappo, A. P. Roles of Heat Shock Proteins in  
620 Apoptosis, Oxidative Stress, Human Inflammatory Diseases, and Cancer. *Pharmaceuticals (Basel)*  
621 **11**, doi:10.3390/ph11010002 (2017).
- 622 63 Ren, X., Chen, X., Wang, Z. & Wang, D. Is transcription in sperm stationary or dynamic? *Journal*  
623 *of Reproduction and Development*, 2016-2093 (2017).
- 624 64 Mayer, M. P. & Bukau, B. Hsp70 chaperones: cellular functions and molecular mechanism. *Cell*  
625 *Mol Life Sci* **62**, 670-684, doi:10.1007/s00018-004-4464-6 (2005).
- 626 65 Yue, L. *et al.* Genetic analysis of viable Hsp90 alleles reveals a critical role in *Drosophila*  
627 spermatogenesis. *Genetics* **151**, 1065-1079 (1999).
- 628 66 Ji, Z.-L. *et al.* Association of heat shock proteins, heat shock factors and male infertility. *Asian*  
629 *Pacific Journal of Reproduction* **1**, 76-84 (2012).
- 630 67 Bakthisaran, R., Tangirala, R. & Rao, C. M. Small heat shock proteins: Role in cellular functions  
631 and pathology. *Biochim Biophys Acta* **1854**, 291-319, doi:10.1016/j.bbapap.2014.12.019 (2015).
- 632 68 Altschul, S. F., Gish, W., Miller, W., Myers, E. W. & Lipman, D. J. Basic local alignment search  
633 tool. *J Mol Biol* **215**, 403-410, doi:10.1016/S0022-2836(05)80360-2 (1990).
- 634 69 Morrow, G. & Tanguay, R. M. *Drosophila melanogaster* Hsp22: a mitochondrial small heat shock  
635 protein influencing the aging process. *Front Genet* **6**, 1026, doi:10.3389/fgene.2015.00103  
636 (2015).
- 637 70 Wójtowicz, I. *et al.* *Drosophila* small heat shock protein CryAB ensures structural integrity of  
638 developing muscles, and proper muscle and heart performance. *Development* **142**, 994-1005,  
639 doi:10.1242/dev.115352 (2015).
- 640 71 Kamradt, M. C., Chen, F. & Cryns, V. L. The small heat shock protein alpha B-crystallin negatively  
641 regulates cytochrome c- and caspase-8-dependent activation of caspase-3 by inhibiting its  
642 autoproteolytic maturation. *J Biol Chem* **276**, 16059-16063, doi:10.1074/jbc.C100107200 (2001).
- 643 72 Paul, C. *et al.* Hsp27 as a negative regulator of cytochrome C release. *Mol Cell Biol* **22**, 816-834  
644 (2002).
- 645 73 Izu, H. *et al.* Heat shock transcription factor 1 is involved in quality-control mechanisms in male  
646 germ cells. *Biol Reprod* **70**, 18-24, doi:10.1095/biolreprod.103.020065 (2004).
- 647 74 Rockett, J. C. *et al.* Effects of hyperthermia on spermatogenesis, apoptosis, gene expression, and  
648 fertility in adult male mice. *Biol Reprod* **65**, 229-239 (2001).
- 649 75 Biggiogera, M. *et al.* Localization of heat shock proteins in mouse male germ cells: an  
650 immunoelectron microscopical study. *Exp Cell Res* **229**, 77-85, doi:10.1006/excr.1996.0345  
651 (1996).



- 652 76 Zhang, X. S. *et al.* Dedifferentiation of adult monkey Sertoli cells through activation of  
653 extracellularly regulated kinase 1/2 induced by heat treatment. *Endocrinology* **147**, 1237-1245,  
654 doi:10.1210/en.2005-0981 (2006).
- 655 77 Collins, A. & Donoghue, A. Viability assessment of honey bee, *Apis mellifera*, sperm using dual  
656 fluorescent staining. *Theriogenology* **51**, 1513-1523 (1999).
- 657 78 Cobey, S. W., Tarpy, D. R. & Woyke, J. Standard methods for instrumental insemination of *Apis*  
658 *mellifera* queens. *Journal of Apicultural Research* **52**, 1-18 (2013).
- 659 79 Taylor, C. M., Coffey, P. L., Hamby, K. A. & Dively, G. P. Laboratory rearing of *Halyomorpha halys*:  
660 methods to optimize survival and fitness of adults during and after diapause. *Journal of Pest*  
661 *Science* **90**, 1069-1077 (2017).
- 662 80 Mackensen, O. Effect of carbon dioxide on initial oviposition of artificially inseminated and virgin  
663 queen bees. *Journal of economic entomology* **40**, 344-349 (2014).
- 664 81 Rappsilber, J., Ishihama, Y. & Mann, M. Stop and go extraction tips for matrix-assisted laser  
665 desorption/ionization, nanoelectrospray, and LC/MS sample pretreatment in proteomics. *Anal*  
666 *Chem* **75**, 663-670 (2003).
- 667 82 McAfee, A., Chan, Q., Evans, J. & Foster, L. J. A *Varroa destructor* protein atlas reveals molecular  
668 underpinnings of developmental transitions and sexual differentiation. *Mol Cell Proteomics*,  
669 doi:10.1074/mcp.RA117.000104 (2017).
- 670 83 Lee, H. K., Braynen, W., Keshav, K. & Pavlidis, P. ErmineJ: tool for functional analysis of gene  
671 expression data sets. *BMC Bioinformatics* **6**, 269, doi:10.1186/1471-2105-6-269 (2005).

672

#### 673 **Data availability statement**

674 All raw mass spectrometry data, databases, and search results are available on PRIDE ProteomeXchange  
675 (accession: PXD013728). Figures with associated raw mass spectrometry data include Figs. 4, 5, 6, and  
676 S4. Global protein abundances and p values for the laboratory heat-shock comparisons are available in  
677 Table S1. Data used to generate other figures will be provided upon request.

#### 678 **Code availability statement**

679 No specialized code central to our conclusions was used in this manuscript. R code for standard  
680 statistical analyses and figure generation will be provided upon request.

#### 681 **Acknowledgements**

682 This work was supported by an NSERC Discovery grant (311654-11) and grants from Genome Canada  
683 and Genome British Columbia awarded to LJF, a Project *Apis m* grant (PAm AGR-13255) awarded to

684 MMG, a Project Apis m grant awarded to JSP, and a USDA-NIFA grant (2016-07962) awarded to JSP and  
685 DRT. We would like to thank Alexandra Sébastien and Meghan Jelen for providing us with stink bugs and  
686 fruit flies, respectively, for the survival experiments.

687 We also thank Ashurst Bee Company for help with colony heat testing and Kettle Valley Queens, Nicola  
688 Valley Honey, Wild Antho, Campbells Gold Honey, Heather Meadows Honey Farm, Six Legs Good  
689 Apiaries, Wildwood Queens, Cariboo Honey, and Worker Bee Honey Company for donating failed and  
690 healthy queens for this research.

#### 691 **Author contributions**

692 AM wrote the first draft of the manuscript and revisions, conducted all data analysis, made the figures,  
693 and performed the proteomics experiments. AC and AM conducted the failed queen survey, with  
694 assistance from HH and MMG. HH and MMG executed the queen shipment temperature tracking. JM  
695 performed the survival experiments. MMG and JSP performed the drone sperm viability analyses. JSP  
696 performed the queen sperm viability measurements across the range of temperatures and measured  
697 internal hive temperatures. Grants to LJF, JSP, MMG, and DRT funded the research. All authors  
698 contributed intellectually.

#### 699 **Competing interests**

700 JSP owns a honey bee consulting business.

701

702

703

704

705 **Figures and Legends**

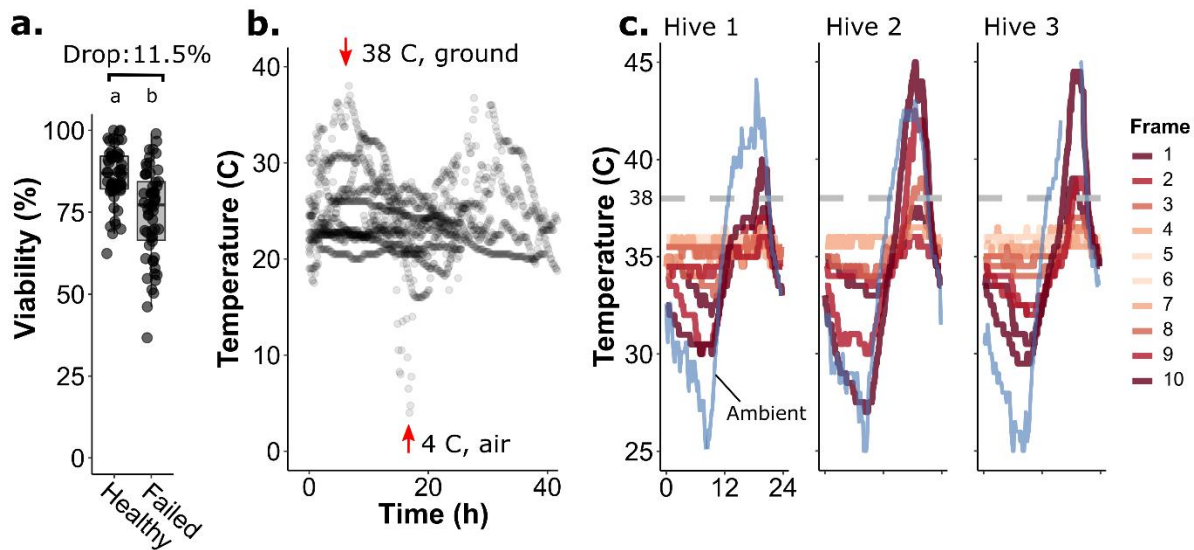

706

707 **Figure 1. Observational data on shipping temperatures, hive temperatures, and stored sperm viability.**  
708 A) Healthy (N = 55) and failed queens (N = 58) were collected from BC beekeepers for sperm viability  
709 analysis. Failed queens had significantly lower sperm viability ( $F = 28.16$ ,  $P = 5.8E-06$ ), with an average  
710 drop of 11.5%. B) Temperatures of eight domestic Canadian queen shipments were recorded during the  
711 summer of 2019 (7 via ground, 1 via air transportation). Temperature loggers were kept immediately  
712 adjacent to the queen cages. C) Internal temperatures of three hives were recorded, with temperature  
713 loggers placed between each frame. Ambient temperatures were recorded in the shade beneath each  
714 hive.

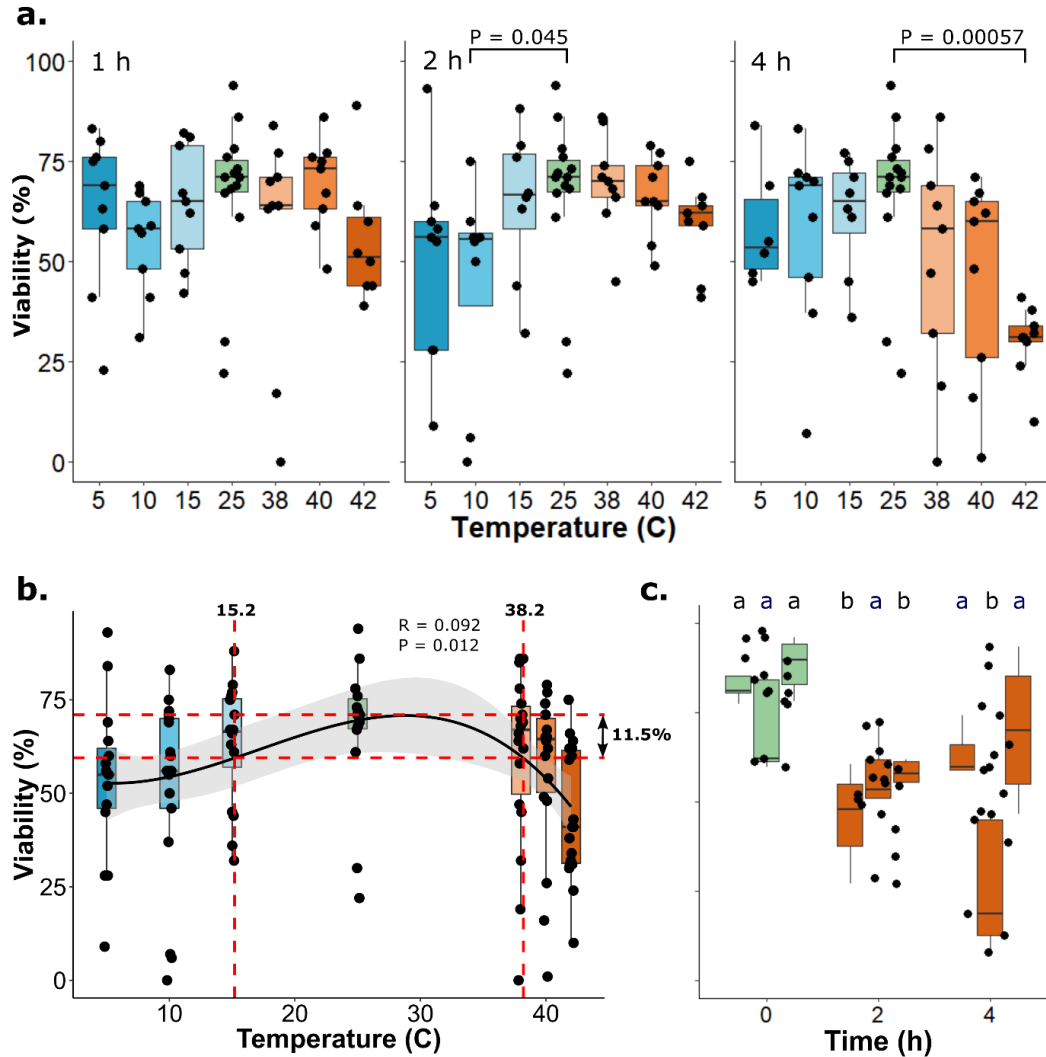

715

716 **Figure 2. Viability of stored and ejaculated sperm after temperature stress.** In all cases, boxes represent  
 717 the bounds between the 2<sup>st</sup> and 3<sup>rd</sup> interquartile range (IQR), midlines represent the median, and  
 718 whiskers are extended by 1.5\*IQR. A) Honey bee queens were heat- and cold-shocked for 1 - 4 hours, then  
 719 held at 25°C prior to assessing stored sperm viability. The 25°C treatment is the negative control (the same  
 720 control data is replotted in each panel). Each data point represents the viability measurement for a single  
 721 queen. Data were analyzed with a Kruskal-Wallis test followed by a Dunnett's *post hoc* test. See **Table 1**  
 722 for sample sizes. B) Combined 2 h and 4 h treatments were optimally fit with a cubic model ( $R^2 = 0.092$ ,  $P$   
 723  $= 0.012$ ). Thresholded at 11.5% loss of viability, the line  $y = y_{\max} - 11.5$  intersects with temperatures 15.2  
 724 and 38.2°C. C) Ejaculated honey bee semen from three different colonies (5-6 drones per colony,  
 725 illustrated as different boxes) was subject to heat-shock at 42°C for 2 h and 4 h, then kept at 25°C for 2 d.  
 726 The total number of drones evaluated for 0, 2, and 4 h treatments were 16, 16, and 18, respectively (see  
 727 **Table 2** for more detail). Each data point represents the viability measurement for a single drone. Letters  
 728 indicate significant differences at  $P < 0.05$  (two-way ANOVA, factors: colony and time, followed by a Tukey  
 729 HSD *post hoc* test).

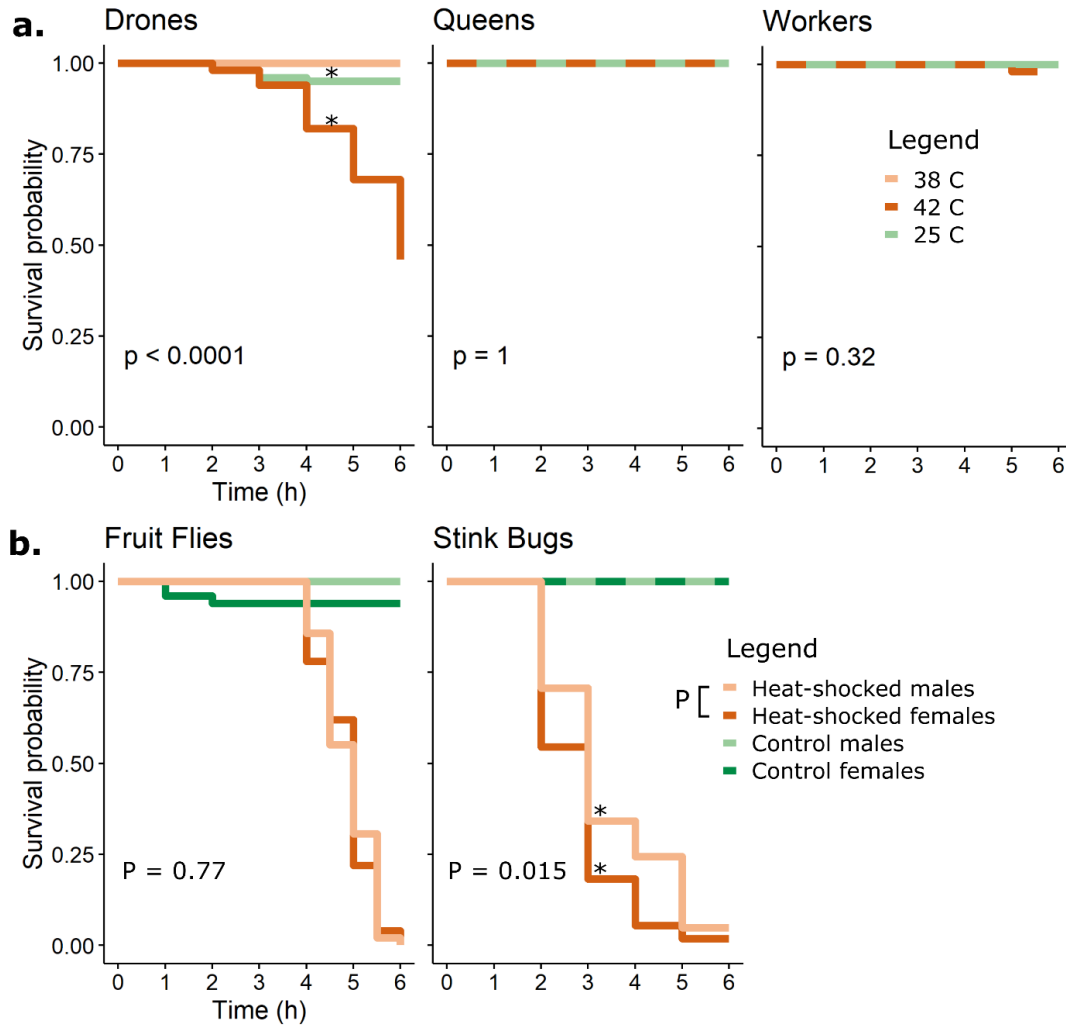

730

731 **Figure 3. Sex-biased heat mortality in honey bees, stink bugs, and fruit flies.** Statistical differences  
 732 were evaluated using a log-rank test. Asterisks indicate significant differences. See **Fig S1** for risk tables,  
 733 including population sizes used to generate survival curves. A) Honey bees (drones, queens, and  
 734 workers) were held at different temperatures and mortality was recorded hourly. Drones are sensitive  
 735 to heat, whereas queens and workers are not. B) Fruit flies (*Drosophila melanogaster*; heat-shock =  
 736 38°C) and stink bugs (*Halyomorpha halys*; heat-shock = 42°C) do not have sex-biased heat sensitivity. For  
 737 fruit flies, loss of motility was used as the endpoint.

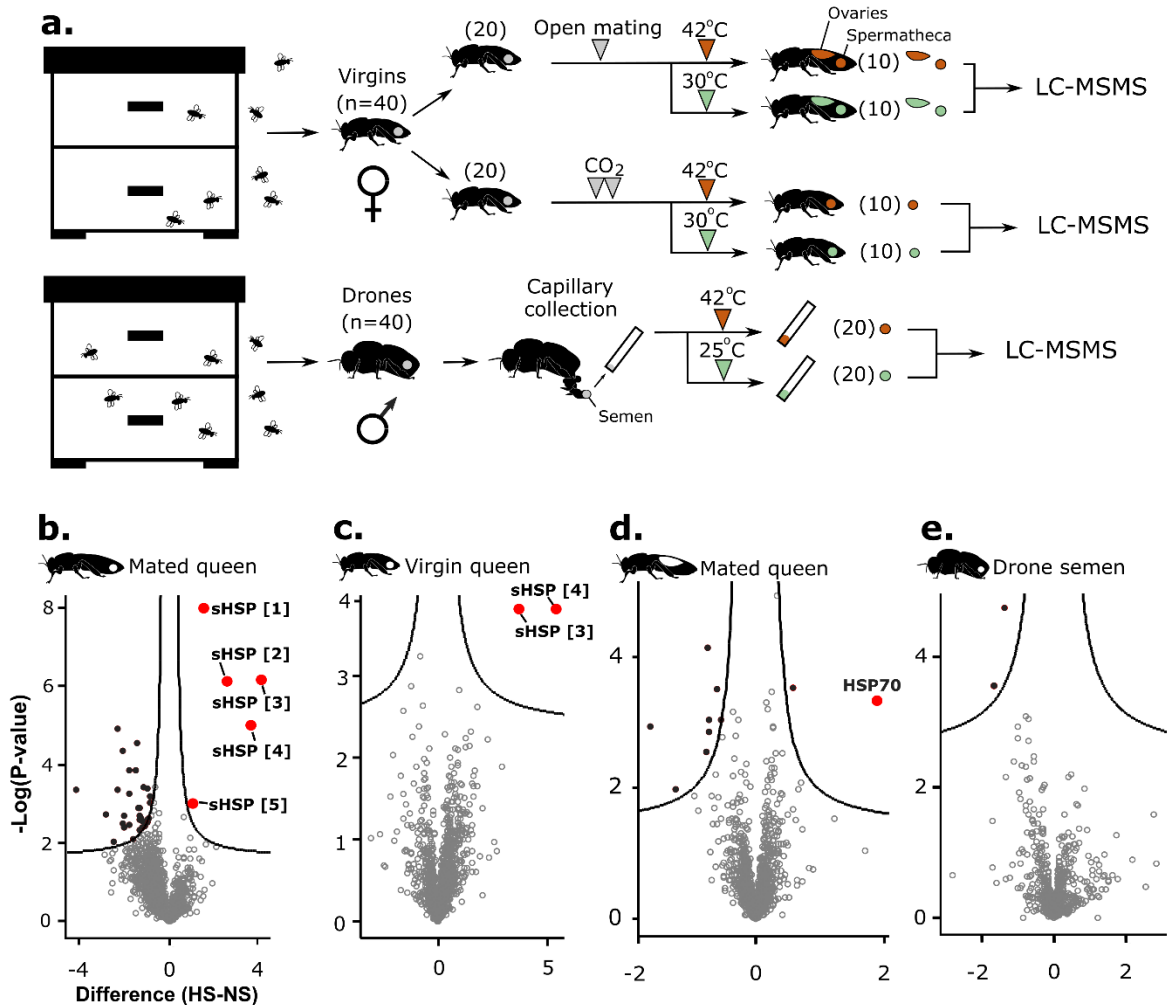

738

739

740 **Figure 4. Differential protein expression comparing heat-shocked (HS) and not heat-shocked (NS)**

741 **reproductive tissues.** A) Samples included mated queen spermathecae, virgin queen spermathecae,

742 ejaculated semen, and mated queen ovaries, which were all analyzed by intensity-based, label-free

743 quantitative tandem mass spectrometry. For drones, 4 semen samples were pooled into one replicate,

744 then fractionated into eight fractions by basic reverse phase chromatography prior to analyzing by mass

745 spectrometry (final biological replicates: n = 5 heat-shocked and 5 non-heat-shocked). The significance

746 cut-off for volcano plots (B-E) was 10% FDR (false discovery rate, permutation-based). Volcano plots

747 represent mated queen spermathecae (B), virgin spermathecae (C), mated queen ovaries (D), and drone

748 semen (E). Differentially expressed HSPs are red; other differentially expressed proteins are black.

749 Accessions for sHSP [1-5] are XP\_001120194.1, XP\_001119884.1, XP\_395659.1, XP\_001120006.2, and

XP\_026294937.1, respectively. The accession for HSP70 is NP\_001153536.1.

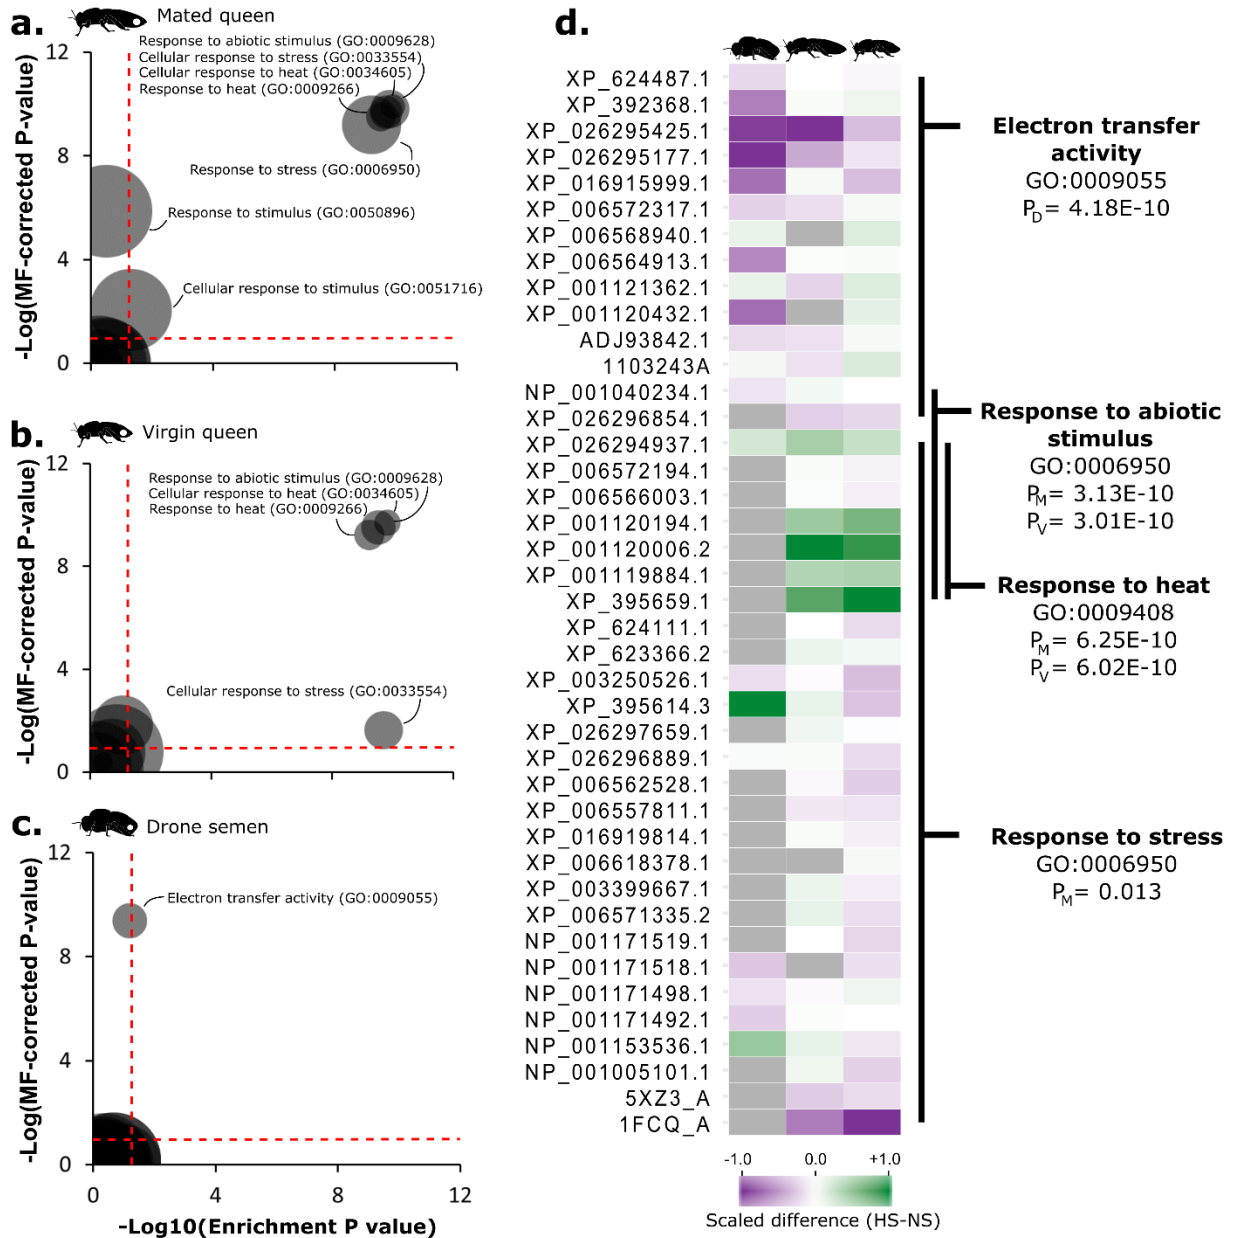

750  
 751 **Figure 5. Gene ontology (GO) term enrichment analyses.** A-C) Enrichments were performed via gene  
 752 score resampling, correcting for both multiple hypothesis testing and protein multifunctionality (MF). The  
 753 x-axes depict enrichment P values (10% FDR, Benjamini-Hochberg correction) without multifunctionality  
 754 correction. The y-axes depict enrichment P values after correction for both multiple hypotheses and  
 755 multifunctionality. The red dotted lines indicate the P value significance cut-off that achieves 10% FDR. D)  
 756 Summary of proteins associated with significantly enriched GO terms. Subscripts refer to comparisons  
 757 within drones (D), mated queens (M), and virgin queens (V).

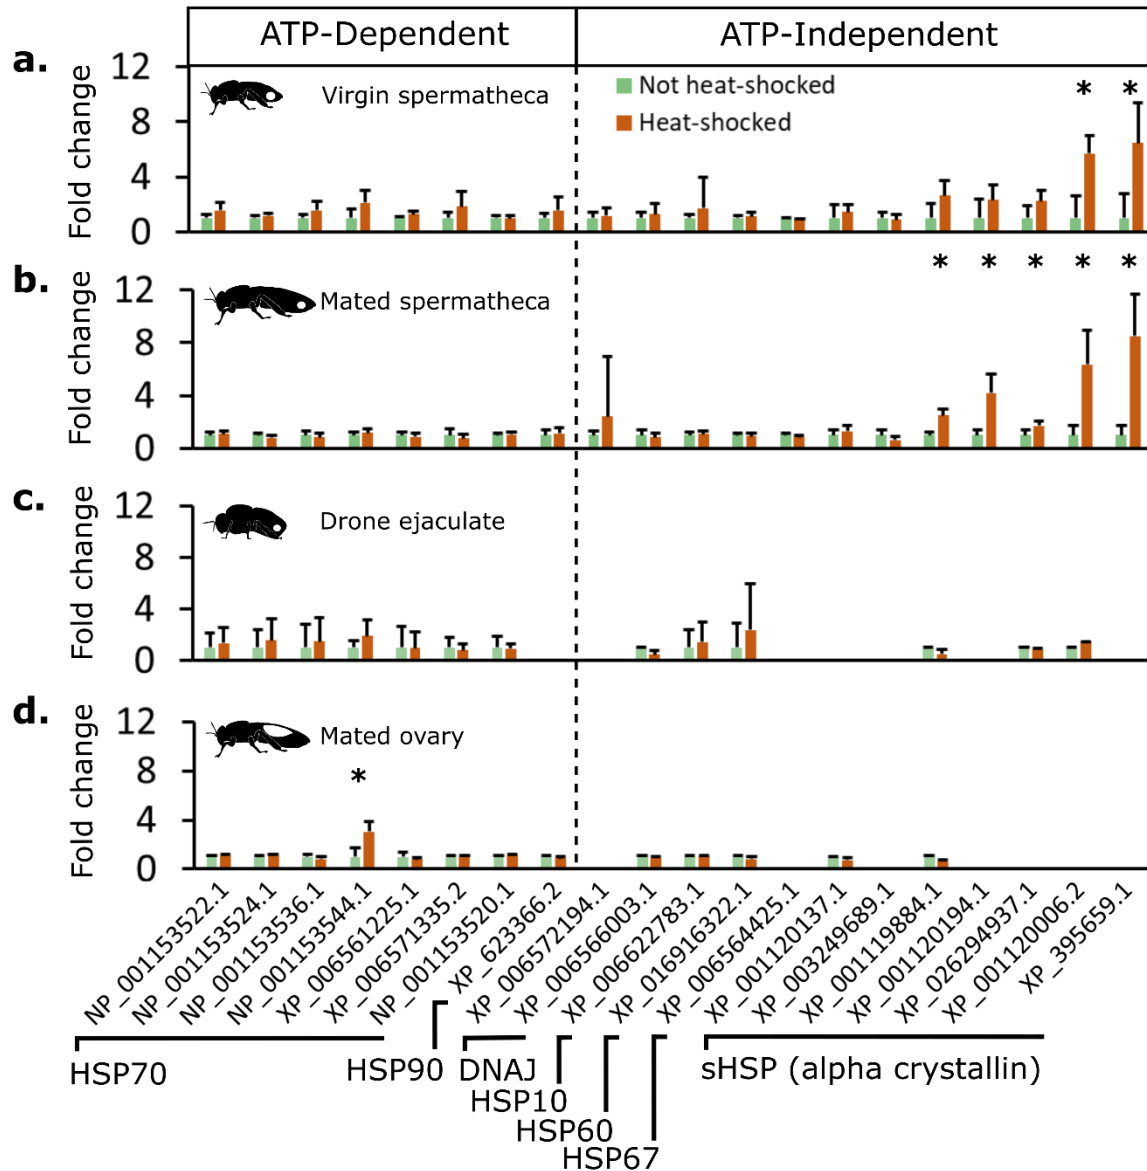

758

759 **Figure 6. Heat-shock protein expression profiles.** Proteins with GO terms for cellular response to heat  
 760 were retrieved from the proteomics datasets. Fold-change is relative to the non-heat-shocked state.  
 761 Proteins marked with an asterisk were significantly up-regulated in the global differential gene expression  
 762 analysis (permutation-based FDR: 10%), and error bars indicate standard deviations.

763

764

765

766

767



768 **Tables**

**Table 1. Biological replicates for queen temperature stress tests**

| <b>Temperature</b> | <b>0 h</b> | <b>1 h</b> | <b>2 h</b> | <b>4 h</b> |
|--------------------|------------|------------|------------|------------|
| 5°C                |            | 9          | 9          | 9          |
| 10°C               |            | 9          | 8          | 9          |
| 15°C               |            | 9          | 8          | 8          |
| 25°C               | 14         |            |            |            |
| 38°C               |            | 9          | 9          | 9          |
| 40°C               |            | 9          | 9          | 9          |
| 42°C               |            | 8          | 9          | 9          |
| <b>Total</b>       | 14         | 53         | 52         | 53         |

**Table 2. Biological replicates for drone temperature stress tests\***

| <b>Colony</b> | <b>0 h</b> | <b>2 h</b> | <b>4 h</b> |
|---------------|------------|------------|------------|
| 1             | 5          | 5          | 6          |
| 2             | 6          | 6          | 6          |
| 3             | 5          | 5          | 6          |
| <b>Total</b>  | 16         | 16         | 18         |

769 \*Temperature stress for all replicates was 42°C
